# Supplementary material for: Electrochemically enhanced oxygen evolution and urea oxidation reactions with advanced high-entropy LDH nanoneedles
Source: Royal Society of Chemistry journal article supplement (doi:10.1039/d5se00054h), 2025-01-01
Supplement: d5se00054h1.pdf [file d5se00054h1.pdf]

## Electrochemically Enhanced Oxygen Evolution and Urea Oxidation Reactions with Advanced High-Entropy LDH Nanoneedles

Chandrasekaran Pitchai,<sup>a</sup> and Chih-Ming Chen<sup>a,b\*</sup>

<sup>a</sup> Department of Chemical Engineering, National Chung Hsing University, Taichung 402202,  
Taiwan.

<sup>b</sup> Innovation and Development Center of Sustainable Agriculture, National Chung Hsing  
University, Taichung 402202, Taiwan

Email: [chencm@nchu.edu.tw](mailto:chencm@nchu.edu.tw), Tel: +886-4-22840510 ext.511

ORCID: <https://orcid.org/0000-0003-4481-1094>

### Experimental Section

#### Material synthesis

A high-entropy layered double hydroxide (LDH) sample was synthesized using a one-step hydrothermal method. To summarize, equimolar amounts (0.45 mmol each) of Fe (NO<sub>3</sub>)<sub>3</sub>·9H<sub>2</sub>O, Zn (NO<sub>3</sub>)<sub>2</sub>·6H<sub>2</sub>O, Co (NO<sub>3</sub>)<sub>2</sub>·6H<sub>2</sub>O, Mn (NO<sub>3</sub>)<sub>2</sub>·6H<sub>2</sub>O, and Cr (NO<sub>3</sub>)<sub>3</sub>·9H<sub>2</sub>O were dissolved in 40 mL of DI water along with 10 mmol of urea under continuous stirring for 1 hour, the pH adjusted to 10 by the addition of 1 M NaOH and 1 M Na<sub>2</sub>CO<sub>3</sub>. The resulting solution was then transferred into a 100 mL Teflon-lined stainless-steel autoclave and heated at 180 °C in an oven for 12 hours. After allowing the autoclave to naturally cool down, the sample was washed repeatedly using DI water and ethanol, followed by drying in a vacuum oven at 60 °C for 12 hours. This resulting sample was labeled as HE-FCCMZ LDH. For comparison, ternary (CoCrMn), and quaternary (FeCoCrMn) metal LDHs were also synthesized using the same method, with relevant metal precursors, and urea.

#### Characterization of HE-FCCMZ LDH

The dimensions and arrangement of the synthesized HE-FCCMZ LDH were evaluated using high-resolution transmission electron microscopy (HR-TEM) and scanning electron microscopy (SEM) images, along with energy-dispersive X-ray spectroscopy (EDX) obtained from JEOL JEM-2010 (operating at 200 kV) and ZEISS ULTRA PLUS, respectively. The crystalline nature of the prepared electrocatalyst was determined utilizing a X-ray diffractometer (HR-XRD, D8 SSS, Bruker, Germany) with Cu K $\alpha$  radiation ( $\lambda = 1.54 \text{ \AA}$ ). The confirmation of functional groups in the synthesized CoFe-LDH/MoS<sub>2</sub>@NDCDs was carried out using JASCO FT-IR 460 Plus, covering a wavenumber range of 400–4000 cm<sup>-1</sup>. Electronic states of the prepared electrocatalyst were investigated using an XPS analyzer, specifically the ULVAC-PHI, PHI 5000 VersaProbe. The Brunauer-Emmett-Teller (BET)

surface area of the HE-FCCMZ LDH was determined through nitrogen gas adsorption–desorption measurements conducted with ASAP 2020 equipment from Micromeritics, Norcross, GA, at the boiling point of liquid nitrogen (77.4 K).

### **Electrochemical studies**

Electrochemical assessments, encompassing linear sweep voltammetry (LSV), Tafel analysis, chronopotentiometry, electrochemical impedance spectroscopy (EIS), and electrochemical active surface area (ECSA) evaluations, were carried out using a CHI6279E electrochemical workstation for each of the three reactions individually. These experiments employed standard three-electrode setup for the oxygen evolution reaction (OER). The HE-FCCMZ LDH, in their prepared state, were coated onto a nickel foam (NF) and utilized as the working electrode. The reference electrode employed was Hg/HgO, and the counter electrode was Pt wire. The coating procedure involved cutting a 1x1 cm<sup>2</sup> piece of nickel foam, subjecting it to sonication in acetone and then in 3 M HCl acid for approximately 20 minutes each. Following sonication, the nickel foam was thoroughly rinsed with deionized water and ethanol and dried completely. Subsequently, 10 mg of the synthesized HE-FCCMZ LDH and 20 μL of a 5% Nafion solution were mixed with an ethanol/water solution and evenly dropcasted onto the surface of the nickel foam, after which it was allowed to dry. A 1 M KOH solution served as the electrolyte for all the electrochemical reactions.

### **Linear sweep voltammetry and Tafel slope measurements**

The linear sweep voltammetry (LSV) measurement for OER was conducted within specific potential ranges of 0 V to 1 V with scan rate of 10 mV/s. In accordance with equation S1, all potentials were converted to the reversible hydrogen electrode (RHE) scale without compensation for iR drop for both HER and OER.

$$E (\text{vs. RHE}) = E (\text{vs. Hg/HgO}) + E_{\text{Hg/HgO}}(\text{ref}) + 0.0591 \text{ V} \times \text{pH} \text{ ----- (S1)}$$

$$\eta = a + b \log |j| \text{----- (S2)}$$

The Tafel slope value was calculated from the **eqn. S2** where  $\eta$  is the overpotential,  $b$  and  $j$  are the Tafel slope and the current density, respectively.

### **Electrochemical impedance spectroscopy measurements**

EIS was conducted over a frequency range of 10<sup>5</sup> to 0.1 Hz with a 5 mV amplitude, maintaining an open circuit potential (OCP). The acquired results were fitted using an appropriate equivalent circuit.

### **Chronopotentiometry**

The stability and durability of the synthesized electrocatalyst were assessed through chronopotentiometric studies. The experiment involved maintaining a constant current density of 10 mA cm<sup>-2</sup> over a duration of 60 hours.

### Calculation of electrochemical active surface area

Cyclic voltammetry (CV) was employed to calculate the electrochemical active surface area by measuring the double-layer capacitance ( $C_{dl}$ ). CV curves were obtained from the non-faradic region at various scan rates ranging from 10 to 100 mV/s. The double-layer capacitance was determined by analyzing the slope of the average current density versus scan rate through linear fit values, and it was directly linked to the electrochemical surface area (ECSA). Equation (S4) outlines the relationship between double-layer charging current density ( $j_{dl}$ ), scan rate ( $v$ ), and the double-layer capacitance ( $C_{dl}$ ).

$$j_{dl} = v C_{dl} \quad (\text{S3})$$

$$\text{ECSA} = C_{dl} / C_s \quad (\text{S4})$$

From equation (S5), the ECSA was calculated using the double layer capacitance ( $C_{dl}$ ) and  $C_s$ , where  $C_s$  is specific capacitance of the sample in identical electrolyte solution.

ECSA normalization

$$\text{Specific activity} = J_{\text{ECSA}} = \frac{J_{\text{geo}}}{\text{ECSA}} \quad (\text{S5})$$

### Calculation of Turn over Frequency (TOF)

TOF is simply defined as the number of moles of O<sub>2</sub> formed per unit time from a catalytic active site. The equation used to calculate the TOF value of a catalyst is provided below:

$$\text{TOF} = j \times \text{NA} / F \times n \times \tau \quad (\text{S6})$$

Here,  $J$  is the current density at a certain overpotential,  $\text{NA}$  is the Avogadro number,  $n$  is the number of electron transfer ( $n = 4$ ),  $F$  is faraday constant and  $\tau$  is the number active sites over the working electrode surface. The  $\tau$  value can be calculated from the redox area curve, obtained from the CV at the highest possible scan rates.

## Results and Discussion

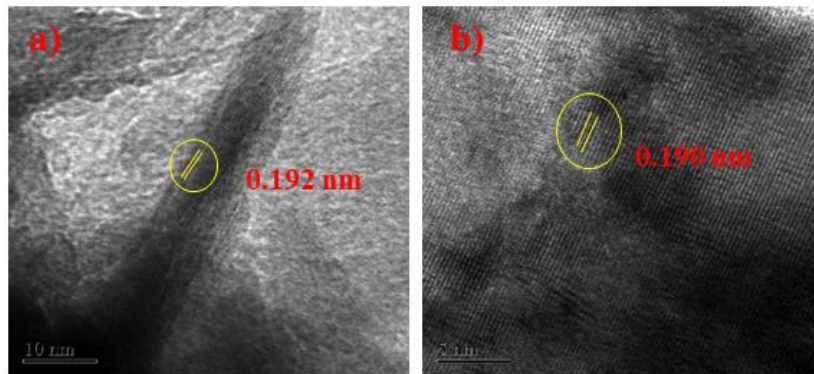

Fig S1. FE-TEM images of a) ME-FCCM LDH and b) LE-CCM LDH

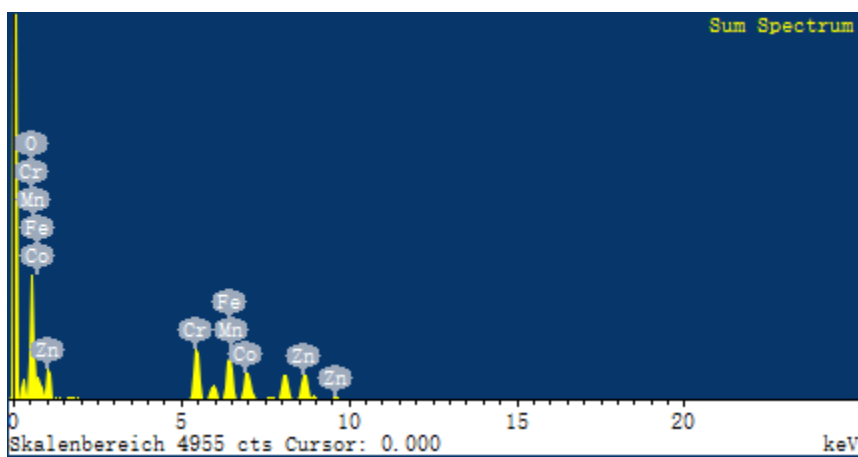

Fig. S2 EDX spectra of the HE-FCCMZ LDH

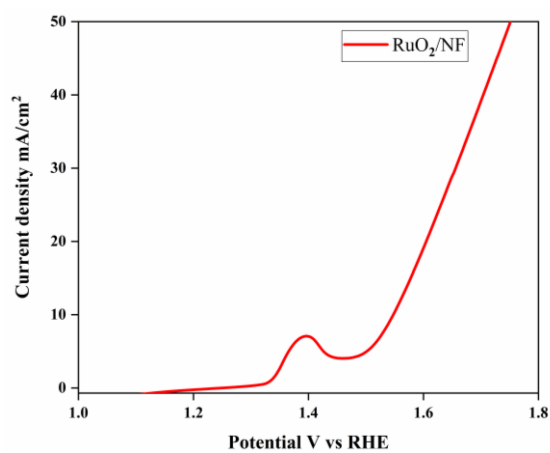

Fig. S3. LSV curve for RuO<sub>2</sub>/NF in 1 M KOH

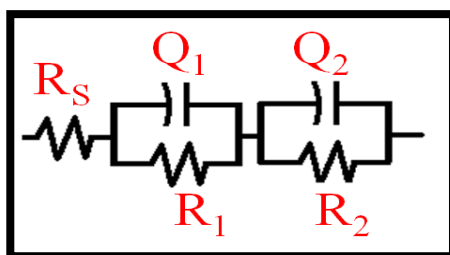

**Fig. S4. Equivalent circuits for LE-CCM LDH, ME-FCCM LDH and HE-FCCMZ LDH**

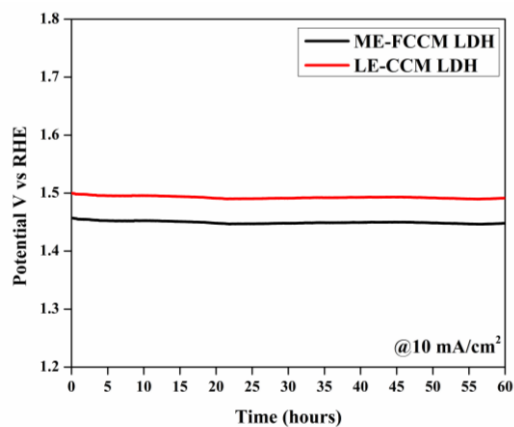

**Fig. S5 Chronopotentiometry curves for ME-FCCM LDH and LE-CCM LDH for 60 hours of O<sub>2</sub> evolution**

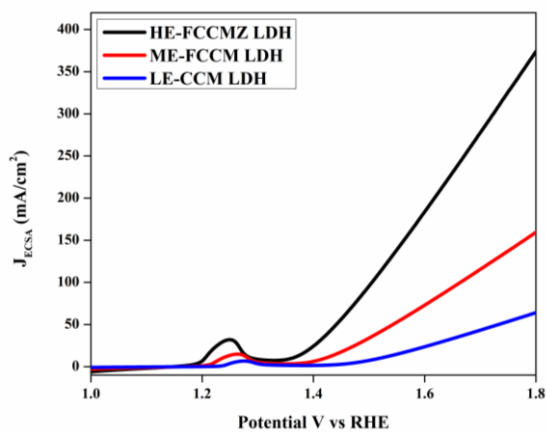

**Fig. S6 LSV normalisation curves for HE FCCMZ LDH, ME-FCCM LDH and LE-CCM LDH**

**Table S1. Comparison of OER electrocatalysts characteristics with recent reports.**

| <b>Materials</b>                             | <b>Current density (mA/cm<sup>2</sup>)</b> | <b>Over potential (mV)</b> | <b>Tafel slope (mV/dec)</b> | <b>Stability (h)/Current density (mA/cm<sup>2</sup>)</b> | <b>Ref</b> |
|----------------------------------------------|--------------------------------------------|----------------------------|-----------------------------|----------------------------------------------------------|------------|
| <b>Au<sub>SA</sub>-MnFeCoNiCu</b>            | 100 (10)                                   | 260 (213)                  | 27.5                        | 700/100                                                  | 1          |
| <b>LDH</b>                                   |                                            |                            |                             |                                                          |            |
| <b>(FeCoNiCrMn)<sub>3</sub>O<sub>4</sub></b> | 10                                         | 239                        | 52.4                        | 24/100                                                   | 2          |
| <b>HEO</b>                                   |                                            |                            |                             |                                                          |            |
| <b>GaFeCoNiCr HEO nanosheet</b>              | 10                                         | 240                        | 37.9                        | 250/10                                                   | 3          |
| <b>HEOs-Ov</b>                               | 10                                         | 284                        | 53                          | 200/100                                                  | 4          |
| <b>FeCoNiMnCuBOy</b>                         | 10                                         | 259                        | 66.1                        | 55/10                                                    | 5          |
| <b>HEO</b>                                   |                                            |                            |                             |                                                          |            |
| <b>NiAlPt-LDH@PHEA</b>                       | 10                                         | 227                        | 25                          | 100/1000                                                 | 6          |
| <b>CoCuFeNiMnMo<sub>1.5</sub></b>            | 10                                         | 375                        | 140                         | 72/10                                                    | 7          |
| <b>Lix(FeCoNiCuZn)<sub>1-x</sub> HEAs</b>    | 10                                         | 221                        | 21.9                        | 80/10                                                    | 8          |
| <b>FeCox-HE LDH</b>                          | 10                                         | 295                        | 61.79                       | 40/10                                                    | 9          |
| <b>HE-FCCMZ LDH</b>                          | 10                                         | 185                        | 49.7                        | 60/10                                                    | This work  |

## References

1. F. Wang, P. Zou, Y. Zhang, W. Pan, Y. Li, L. Liang, C. Chen, H. Liu, and S. Zheng, *Nat. Commun.*, 2023, **14**, 6019.
2. B. Feng, J. Chen, Y. Yang, M. Yang, H. Wang, C. Zhong, X. Zhao, and Y. Yao, *J. Materiomics*, 2024, **10**, 919–927.
3. J. Liang, J. Liu, H. Wang, Z. Li, G. Cao, Z. Zeng, S. Liu, Y. Guo, M. Zeng, and L. Fu, *J. Am. Chem. Soc.*, 2024, **146**, 7118–7123.
4. Y. Liu, C. Ye, L. Chen, J. Fan, C. Liu, L. Xue, J. Sun, W. Zhang, X. Wang, P. Xiong, and J. Zhu, *Adv. Funct. Mater.*, 2024, **34**, 2314820.

5. S. Jiang, Y. Yu, H. He, Z. Wang, R. Zheng, H. Sun, Y. Liu, and D. Wang, *Small*, 2024, **20**, 2310786.
6. R. Zhou, X. Han, Q. Chen, L. Peng, X. Qiu, P. Wang, C. Guo, J. Wang, Z. Wang, and J. Hao, *J. Mater. Chem. A*, 2024, **12**, 5719–5730.
7. A. Asghari Alamdari, H. Jahangiri, M. B. Yagci, K. Igarashi, H. Matsumoto, A. Motallebzadeh, and U. Unal, *ACS Appl. Energy Mater.*, 2024, **7**, 2423–2435.
8. A. Bao, Y. Gu, Y. Zhang, B. Zhang, J. Wu, B. Ni, X. Zhang, H. Pan, and X. Qi, *Carbon Energy*, 2024, **6**, 519.
9. X. Chu, T. Wang, H. Wang, B. Du, G. Guo, Y. Zhou, and X. Dong, *J. Alloys Compd.*, 2024, **1003**, 175584.
